# Supplementary material
Source: publisher figshare collection journal article supplement (https://acs.figshare.com/ndownloader/files/25719620)
Supplement: Supplementary file 1 [file 25719620]

compound	SMILES	HT-29 GI50 (µM)	SK-MEL-28 GI50 (nM)	SUDHL1 GI50 (nM)	HT-29 MEK1 DC50 (nM)	HT-29 MEK2 DC50 (nM)	SK-MEL 28 MEK1 DC50 (nM)	SK-MEL 28 MEK2 DC50 (nM)	MEK1 Kd (µM)	MEK2 Kd (µM)
5	CC(C)(C)[C@@H](C(N1[C@H](C(NCC2=CC=C(C3=C(C)N=CS3)C=C2)=O)C[C@@H](O)C1)=O)NC(CNCCCONC(C4=CC=C(F)C(F)=C4NC5=CC=C(I)C=C5F)=O)=O	1.8 ± 0.4
6	O=C([C@H]1N(C([C@H](C(C)(C)C)NC(CCNCCCONC(C2=CC=C(F)C(F)=C2NC3=CC=C(I)C=C3F)=O)=O)=O)C[C@H](O)C1)NCC4=CC=C(C5=C(C)N=CS5)C=C4	5.0 ± 1.1
7	O=C([C@H]1N(C([C@H](C(C)(C)C)NC(CCCNCCCONC(C2=CC=C(F)C(F)=C2NC3=CC=C(I)C=C3F)=O)=O)=O)C[C@H](O)C1)NCC4=CC=C(C5=C(C)N=CS5)C=C4	3.1 ± 0.9
8	O=C([C@H]1N(C([C@H](C(C)(C)C)NC(CCCCNCCCONC(C2=CC=C(F)C(F)=C2NC3=CC=C(I)C=C3F)=O)=O)=O)C[C@H](O)C1)NCC4=CC=C(C5=C(C)N=CS5)C=C4	3.0 ± 0.5
9	O=C([C@H]1N(C([C@H](C(C)(C)C)NC(CCCCCNCCCONC(C2=CC=C(F)C(F)=C2NC3=CC=C(I)C=C3F)=O)=O)=O)C[C@H](O)C1)NCC4=CC=C(C5=C(C)N=CS5)C=C4	2.1 ± 0.1
10	O=C([C@H]1N(C([C@H](C(C)(C)C)NC(CCCCCCNCCCONC(C2=CC=C(F)C(F)=C2NC3=CC=C(I)C=C3F)=O)=O)=O)C[C@H](O)C1)NCC4=CC=C(C5=C(C)N=CS5)C=C4	1.4 ± 0.2
11	O=C([C@H]1N(C([C@H](C(C)(C)C)NC(CCCCCCCNCCCONC(C2=CC=C(F)C(F)=C2NC3=CC=C(I)C=C3F)=O)=O)=O)C[C@H](O)C1)NCC4=CC=C(C5=C(C)N=CS5)C=C4	0.5 ± 0.2
12	O=C([C@H]1N(C([C@H](C(C)(C)C)NC(CCCCCCCCNCCCONC(C2=CC=C(F)C(F)=C2NC3=CC=C(I)C=C3F)=O)=O)=O)C[C@H](O)C1)NCC4=CC=C(C5=C(C)N=CS5)C=C4	0.6 ± 0.1
13	O=C([C@H]1N(C([C@H](C(C)(C)C)NC(CCCCCCCCCNCCCONC(C2=CC=C(F)C(F)=C2NC3=CC=C(I)C=C3F)=O)=O)=O)C[C@H](O)C1)NCC4=CC=C(C5=C(C)N=CS5)C=C4	0.5 ± 0.03
14	O=C([C@H]1N(C([C@H](C(C)(C)C)NC(CCCCCCCCCCNCCCONC(C2=CC=C(F)C(F)=C2NC3=CC=C(I)C=C3F)=O)=O)=O)C[C@H](O)C1)NCC4=CC=C(C5=C(C)N=CS5)C=C4	0.4 ± 0.2
15	O=C([C@H]1N(C([C@H](C(C)(C)C)NC(COCCNCCCONC(C2=CC=C(F)C(F)=C2NC3=CC=C(I)C=C3F)=O)=O)=O)C[C@H](O)C1)NCC4=CC=C(C5=C(C)N=CS5)C=C4	4.0 ± 0.2
16	O=C([C@H]1N(C([C@H](C(C)(C)C)NC(CCOCCNCCCONC(C2=CC=C(F)C(F)=C2NC3=CC=C(I)C=C3F)=O)=O)=O)C[C@H](O)C1)NCC4=CC=C(C5=C(C)N=CS5)C=C4	4.8 ± 0.7
17	O=C([C@H]1N(C([C@H](C(C)(C)C)NC(COCCOCCNCCCONC(C2=CC=C(F)C(F)=C2NC3=CC=C(I)C=C3F)=O)=O)=O)C[C@H](O)C1)NCC4=CC=C(C5=C(C)N=CS5)C=C4	1.6 ± 0.3
18	O=C([C@H]1N(C([C@H](C(C)(C)C)NC(CCOCCOCCNCCCONC(C2=CC=C(F)C(F)=C2NC3=CC=C(I)C=C3F)=O)=O)=O)C[C@H](O)C1)NCC4=CC=C(C5=C(C)N=CS5)C=C4	1.6 ± 0.3
19	O=C([C@H]1N(C([C@H](C(C)(C)C)NC(COCCOCCOCCNCCCONC(C2=CC=C(F)C(F)=C2NC3=CC=C(I)C=C3F)=O)=O)=O)C[C@H](O)C1)NCC4=CC=C(C5=C(C)N=CS5)C=C4	1.3 ± 0.1
20	O=C([C@H]1N(C([C@H](C(C)(C)C)NC(CCOCCOCCOCCNCCCONC(C2=CC=C(F)C(F)=C2NC3=CC=C(I)C=C3F)=O)=O)=O)C[C@H](O)C1)NCC4=CC=C(C5=C(C)N=CS5)C=C4	3.3 ± 0.6
21	O=C([C@H]1N(C([C@H](C(C)(C)C)NC(CCOCCOCCOCCOCCNCCCONC(C2=CC=C(F)C(F)=C2NC3=CC=C(I)C=C3F)=O)=O)=O)C[C@H](O)C1)NCC4=CC=C(C5=C(C)N=CS5)C=C4	1.7 ± 0.1
22	O=C([C@H]1N(C([C@H](C(C)(C)C)NC(CCCCCCCCCNCCCONC(C2=CC=C(F)C(F)=C2NC3=CC=C(I)C=C3F)=O)=O)=O)C[C@H](O)C1)N[C@H](C4=CC=C(C5=C(C)N=CS5)C=C4)C	0.24 ± 0.05
23	O=C([C@H]1N(C([C@H](C(C)(C)C)NC(CCCCCCCCCCCNCCCONC(C2=CC=C(F)C(F)=C2NC3=CC=C(I)C=C3F)=O)=O)=O)C[C@H](O)C1)N[C@H](C4=CC=C(C5=C(C)N=CS5)C=C4)C	0.099 ± 0.008
24	O=C([C@H]1N(C([C@H](C(C)(C)C)NC(CCCCCCCCCCN(C)CCCONC(C2=CC=C(F)C(F)=C2NC3=CC=C(I)C=C3F)=O)=O)=O)C[C@H](O)C1)N[C@H](C4=CC=C(C5=C(C)N=CS5)C=C4)C	0.032 ± 0.008	56 ± 4	360 ± 50	18 ± 3	8 ± 1	16 ± 3	6 ± 1	0.40 ± 0.001	1.4 ± 0.54
25	O=C([C@H]1N(C([C@H](C(C)(C)C)NC(CCCCCCCCCNCCCCONC(C2=CC=C(F)C(F)=C2NC3=CC=C(I)C=C3F)=O)=O)=O)C[C@H](O)C1)N[C@H](C4=CC=C(C5=C(C)N=CS5)C=C4)C	0.055 ± 0.005
26	O=C([C@H]1N(C([C@H](C(C)(C)C)NC(CCCCCCCCCCNCCCCONC(C2=CC=C(F)C(F)=C2NC3=CC=C(I)C=C3F)=O)=O)=O)C[C@H](O)C1)N[C@H](C4=CC=C(C5=C(C)N=CS5)C=C4)C	0.043 ± 0.001
27	O=C([C@H]1N(C([C@H](C(C)(C)C)NC(CCCCCCCCCCCNCCCCONC(C2=CC=C(F)C(F)=C2NC3=CC=C(I)C=C3F)=O)=O)=O)C[C@H](O)C1)N[C@H](C4=CC=C(C5=C(C)N=CS5)C=C4)C	0.023 ± 0.005	40 ± 10	330 ± 100	18 ± 1	9 ± 3	10 ± 1	4 ± 1	0.40 ± 0.08	2.0 ± 0.23
28	O=C(NOCCCNCCNC1=CC=CC(C(N2C(CC3)C(NC3=O)=O)=O)=C1C2=O)C4=CC=C(F)C(F)=C4NC5=CC=C(I)C=C5F	0.4 ± 0.01
29	O=C(NOCCCNCCCNC1=CC=CC(C(N2C(CC3)C(NC3=O)=O)=O)=C1C2=O)C4=CC=C(F)C(F)=C4NC5=CC=C(I)C=C5F	1.1 ± 0.07
30	O=C(NOCCCNCCCCNC1=CC=CC(C(N2C(CC3)C(NC3=O)=O)=O)=C1C2=O)C4=CC=C(F)C(F)=C4NC5=CC=C(I)C=C5F	1.9 ± 0.4
31	O=C(NOCCCNCCCCCNC1=CC=CC(C(N2C(CC3)C(NC3=O)=O)=O)=C1C2=O)C4=CC=C(F)C(F)=C4NC5=CC=C(I)C=C5F	1.8 ± 0.5
32	O=C(NOCCCNCCCCCCNC1=CC=CC(C(N2C(CC3)C(NC3=O)=O)=O)=C1C2=O)C4=CC=C(F)C(F)=C4NC5=CC=C(I)C=C5F	3.8 ± 1.7
33	O=C(NOCCCNCCCCCCCNC1=CC=CC(C(N2C(CC3)C(NC3=O)=O)=O)=C1C2=O)C4=CC=C(F)C(F)=C4NC5=CC=C(I)C=C5F	4.5 ± 1.9
34	O=C(NOCCCNCCCCCCCCNC1=CC=CC(C(N2C(CC3)C(NC3=O)=O)=O)=C1C2=O)C4=CC=C(F)C(F)=C4NC5=CC=C(I)C=C5F	3.5 ± 0.9
35	O=C(NOCCCNCCOCCNC1=CC=CC(C(N2C(CC3)C(NC3=O)=O)=O)=C1C2=O)C4=CC=C(F)C(F)=C4NC5=CC=C(I)C=C5F	1.2 ± 0.2
36	O=C(NOCCCNCCOCCOCCNC1=CC=CC(C(N2C(CC3)C(NC3=O)=O)=O)=C1C2=O)C4=CC=C(F)C(F)=C4NC5=CC=C(I)C=C5F	1.3 ± 0.5
37	O=C(NOCCCNCCOCCOCCOCCNC1=CC=CC(C(N2C(CC3)C(NC3=O)=O)=O)=C1C2=O)C4=CC=C(F)C(F)=C4NC5=CC=C(I)C=C5F	0.8 ± 0.2
38	O=C(NOCCCNCCOCCOCCOCCOCCNC1=CC=CC(C(N2C(CC3)C(NC3=O)=O)=O)=C1C2=O)C4=CC=C(F)C(F)=C4NC5=CC=C(I)C=C5F	0.6 ± 0.09
39	O=C(NOCCCNCCOCCOCCOCCOCCOCCNC1=CC=CC(C(N2C(CC3)C(NC3=O)=O)=O)=C1C2=O)C4=CC=C(F)C(F)=C4NC5=CC=C(I)C=C5F	0.6 ± 0.1
40	O=C(NOCCCNCCCNC1=CC2=C(C(N(C(CC3)C(NC3=O)=O)C2=O)=O)C=C1)C4=CC=C(F)C(F)=C4NC5=CC=C(I)C=C5F	0.5 ± 0.2
41	O=C(NOCCCNCCCCNC1=CC2=C(C(N(C(CC3)C(NC3=O)=O)C2=O)=O)C=C1)C4=CC=C(F)C(F)=C4NC5=CC=C(I)C=C5F	1.0 ± 0.4
42	O=C(NOCCCNCCCCCNC1=CC2=C(C(N(C(CC3)C(NC3=O)=O)C2=O)=O)C=C1)C4=CC=C(F)C(F)=C4NC5=CC=C(I)C=C5F	0.5 ± 0.1
43	O=C(NOCCCNCCCCCCNC1=CC2=C(C(N(C(CC3)C(NC3=O)=O)C2=O)=O)C=C1)C4=CC=C(F)C(F)=C4NC5=CC=C(I)C=C5F	1.1 ± 0.5
44	O=C(NOCCCNCCCCCCCNC1=CC2=C(C(N(C(CC3)C(NC3=O)=O)C2=O)=O)C=C1)C4=CC=C(F)C(F)=C4NC5=CC=C(I)C=C5F	0.5 ± 0.2
45	O=C(NOCCCNCCCCCCCCNC1=CC2=C(C(N(C(CC3)C(NC3=O)=O)C2=O)=O)C=C1)C4=CC=C(F)C(F)=C4NC5=CC=C(I)C=C5F	0.3 ± 0.1
46	O=C(NOCCCNCCOCCNC1=CC2=C(C(N(C(CC3)C(NC3=O)=O)C2=O)=O)C=C1)C4=CC=C(F)C(F)=C4NC5=CC=C(I)C=C5F	1.4 ± 0.7
47	O=C(NOCCCNCCOCCOCCNC1=CC2=C(C(N(C(CC3)C(NC3=O)=O)C2=O)=O)C=C1)C4=CC=C(F)C(F)=C4NC5=CC=C(I)C=C5F	1.1 ± 0.3
48	O=C(NOCCCNCCOCCOCCOCCNC1=CC2=C(C(N(C(CC3)C(NC3=O)=O)C2=O)=O)C=C1)C4=CC=C(F)C(F)=C4NC5=CC=C(I)C=C5F	1.5 ± 0.5
49	O=C(NOCCCNCCOCCOCCOCCOCCNC1=CC2=C(C(N(C(CC3)C(NC3=O)=O)C2=O)=O)C=C1)C4=CC=C(F)C(F)=C4NC5=CC=C(I)C=C5F	0.5 ± 0.06
50	O=C(NOCCCNCCOCCOCCOCCOCCOCCNC1=CC2=C(C(N(C(CC3)C(NC3=O)=O)C2=O)=O)C=C1)C4=CC=C(F)C(F)=C4NC5=CC=C(I)C=C5F	0.3 ± 0.06	780 ± 100		118 ± 23	55 ± 19	94 ± 3	38 ± 15	0.66 ± 0.1	2.4 ± 0.13
51	O=C([C@@H]1N(C([C@H](C(C)(C)C)NC(CCCCCCCCCCN(C)CCCONC(C2=CC=C(F)C(F)=C2NC3=CC=C(I)C=C3F)=O)=O)=O)C[C@@H](O)C1)N[C@H](C4=CC=C(C5=C(C)N=CS5)C=C4)C	1.3 ± 0.16	1200 ± 250	1200 ± 170					0.38 ± 0.07	1.7 ± 0.1
52	O=C([C@@H]1N(C([C@H](C(C)(C)C)NC(CCCCCCCCCCCNCCCCONC(C2=CC=C(F)C(F)=C2NC3=CC=C(I)C=C3F)=O)=O)=O)C[C@@H](O)C1)N[C@H](C4=CC=C(C5=C(C)N=CS5)C=C4)C	0.83 ± 0.08	1300 ± 190	1200 ± 100					0.82 ± 0.07	2.2 ± 0.03
53	O=C(NOCCCNCCOCCOCCOCCOCCOCCNC1=CC2=C(C(N(C(CC3)C(N(C)C3=O)=O)C2=O)=O)C=C1)C4=CC=C(F)C(F)=C4NC5=CC=C(I)C=C5F	2.6 ± 0.08	2500 ± 150						1.2 ± 0.17	3.8 ± 0.65
